# Supplementary material for: Key factors in FTIR spectroscopic analysis of DNA: the sampling technique, pretreatment temperature and sample concentration
Source: Royal Society of Chemistry journal article supplement (doi:10.1039/c8ay00386f), 2018-01-01
Supplement: c8ay00386f1.pdf [file c8ay00386f1.pdf]

**Supplementary Figure caption**

Supplementary Fig. S1. The mean SD result performed on HT-FTIR spectra of CT-DNA with different pretreatment temperature

Supplementary Fig. S2. The SNR result performed on HT-FTIR spectra of CT-DNA with different sample amounts

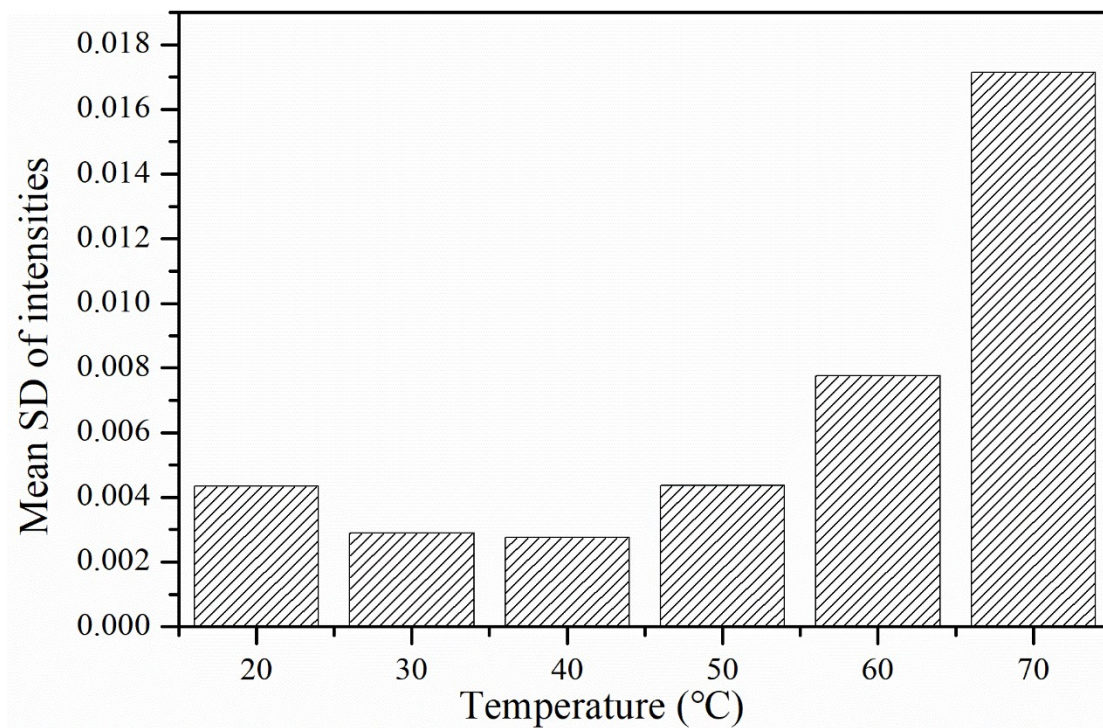

Note: SD refers standard deviation

**Supplementary Fig. S1**

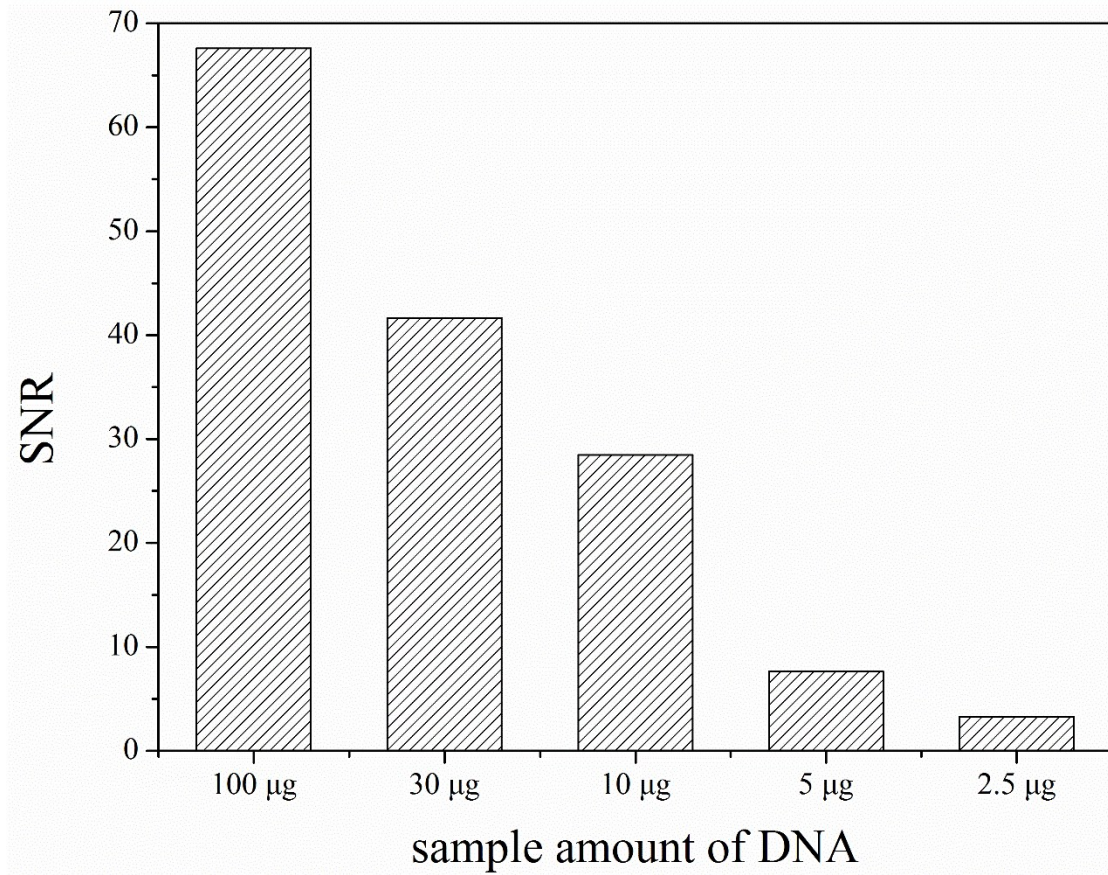

Note: SNR refers signal to noise ratio.

**Supplementary Fig. S2**
